# Supplementary material for: Chitosan Hydrochloride Decreases Fusarium graminearum Growth and Virulence and Boosts Growth, Development and Systemic Acquired Resistance in Two Durum Wheat Genotypes
Source: PubMed Central journal article supplement (PMC7587526; doi:10.3390/molecules25204752), 2020-10-16
Supplement: molecules-25-04752-s001.pdf [file molecules-25-04752-s001.pdf]

## 1 Supplementary Materials

2 **Table S1** Relative expression levels and standard errors of each *F. graminearum* gene selected and compound (chitosan  
3 hydrochloride C, tebuconazole T, azoxystrobin A, and the mixture of tebuconazole and azoxystrobin T + A). Relative  
4 expression values were obtained by using the equation  $2^{-\Delta\Delta C_q}$  with *TEF*, *TUB* and *GAPDH* as reference genes and mock  
5 treatment used to normalize the relative expression levels. The data represent averages and standard errors for the four  
6 independent biological replicates and the four technical replicates examined. The data were subjected to one-way analysis  
7 of variance (ANOVA). Different letters among the plant treatments were assessed by means of significant F values by  
8 applying the Tukey Honestly Significant Difference Test (Tukey test) at 0.99 confidence level ( $p < 0.01$ ).

| Gene           |                          | C     | T     | A     | T + A |
|----------------|--------------------------|-------|-------|-------|-------|
| <i>Erg3</i>    | Relative expression      | 0.01  | 2.19  | 2.58  | 0.92  |
|                | Standard error ( $\pm$ ) | 0.044 | 0.065 | 0.047 | 0.05  |
|                | $p < 0.01$               | b     | a     | a     | ab    |
| <i>Fg03624</i> | Relative expression      | 0.33  | 0.59  | 0.61  | 0.87  |
|                | Standard error ( $\pm$ ) | 0.02  | 0.12  | 0.13  | 0.04  |
|                | $p < 0.01$               | b     | ab    | ab    | a     |
| <i>Fg03695</i> | Relative expression      | 0.01  | 0.38  | 0.11  | 0.12  |
|                | Standard error ( $\pm$ ) | 0.06  | 0.38  | 0.01  | 0.09  |
|                | $p < 0.01$               | c     | a     | bc    | b     |
| <i>Fg07551</i> | Relative expression      | 0.01  | 0.15  | 0.50  | 0.23  |
|                | Standard error ( $\pm$ ) | 0.07  | 0.10  | 0.13  | 0.01  |
|                | $p < 0.01$               | b     | b     | a     | ab    |
| <i>Fg09443</i> | Relative expression      | 0.04  | 1.54  | 0.36  | 1.18  |
|                | Standard error ( $\pm$ ) | 0.06  | 0.06  | 0.18  | 0.11  |
|                | $p < 0.01$               | c     | a     | bc    | ab    |
| <i>Fg03725</i> | Relative expression      | 0.01  | 0.57  | 0.08  | 0.88  |
|                | Standard error ( $\pm$ ) | 0.01  | 0.12  | 0.08  | 0.07  |
|                | $p < 0.01$               | c     | ab    | bc    | a     |
| <i>Fg01572</i> | Relative expression      | 0.04  | 9.64  | 2.69  | 5.69  |
|                | Standard error ( $\pm$ ) | 0.05  | 0.07  | 0.03  | 0.03  |
|                | $p < 0.01$               | c     | a     | bc    | ab    |
| <i>Fg04196</i> | Relative expression      | 0.01  | 1.30  | 0.64  | 1.58  |
|                | Standard error ( $\pm$ ) | 0.02  | 0.03  | 0.14  | 0.09  |
|                | $p < 0.01$               | b     | a     | ab    | a     |
| <i>Fg06619</i> | Relative expression      | 0.04  | 1.23  | 2.44  | 0.93  |
|                | Standard error ( $\pm$ ) | 0.08  | 0.06  | 0.16  | 0.08  |
|                | $p < 0.01$               | b     | ab    | a     | ab    |
| <i>Fg10231</i> | Relative expression      | 0.10  | 4.00  | 4.90  | 4.30  |
|                | Standard error ( $\pm$ ) | 0.01  | 0.03  | 0.03  | 0.11  |

|              |                          |            |      |       |       |       |
|--------------|--------------------------|------------|------|-------|-------|-------|
|              |                          | $p < 0.01$ | b    | a     | a     | a     |
|              | Relative expression      |            | 0.11 | 3.25  | 1.33  | 4.38  |
| <i>FPP</i>   | Standard error ( $\pm$ ) |            | 0.01 | 0.77  | 0.22  | 0.22  |
|              |                          | $p < 0.01$ | c    | ab    | bc    | a     |
|              | Relative expression      |            | 0.02 | 0.03  | 1.30  | 0.31  |
| <i>Tri1</i>  | Standard error ( $\pm$ ) |            | 0.07 | 0.10  | 0.09  | 0.09  |
|              |                          | $p < 0.01$ | b    | b     | a     | b     |
|              | Relative expression      |            | 0.01 | 0.82  | 1.33  | 0.30  |
| <i>Tri3</i>  | Standard error ( $\pm$ ) |            | 0.04 | 0.15  | 0.23  | 0.08  |
|              |                          | $p < 0.01$ | c    | ab    | a     | bc    |
|              | Relative expression      |            | 0.02 | 0.07  | 0.21  | 0.03  |
| <i>Tri4</i>  | Standard error ( $\pm$ ) |            | 0.00 | 0.18  | 0.03  | 0.01  |
|              |                          | $p < 0.01$ | b    | b     | a     | b     |
|              | Relative expression      |            | 0.02 | 1.67  | 2.76  | 0.60  |
| <i>Tri5</i>  | Standard error ( $\pm$ ) |            | 0.07 | 0.15  | 0.34  | 0.33  |
|              |                          | $p < 0.01$ | b    | ab    | a     | b     |
|              | Relative expression      |            | 0.03 | 2.09  | 2.05  | 0.82  |
| <i>Tri6</i>  | Standard error ( $\pm$ ) |            | 0.08 | 0.39  | 0.16  | 0.16  |
|              |                          | $p < 0.01$ | c    | a     | ab    | bc    |
|              | Relative expression      |            | 3.34 | 19.94 | 11.52 | 16.81 |
| <i>Tri8</i>  | Standard error ( $\pm$ ) |            | 0.09 | 5.23  | 2.29  | 2.94  |
|              |                          | $p < 0.01$ | b    | a     | ab    | a     |
|              | Relative expression      |            | 0.01 | 4.98  | 2.04  | 0.52  |
| <i>Tri9</i>  | Standard error ( $\pm$ ) |            | 0.00 | 0.01  | 0.58  | 0.13  |
|              |                          | $p < 0.01$ | c    | a     | bc    | bc    |
|              | Relative expression      |            | 0.02 | 2.73  | 4.19  | 0.18  |
| <i>Tri10</i> | Standard error ( $\pm$ ) |            | 0.01 | 0.84  | 0.72  | 0.04  |
|              |                          | $p < 0.01$ | b    | ab    | a     | b     |
|              | Relative expression      |            | 0.15 | 26.84 | 4.90  | 1.44  |
| <i>Tri11</i> | Standard error ( $\pm$ ) |            | 0.01 | 0.92  | 0.76  | 0.55  |
|              |                          | $p < 0.01$ | c    | a     | b     | c     |
|              | Relative expression      |            | 0.05 | 24.95 | 13.21 | 5.12  |
| <i>Tri12</i> | Standard error ( $\pm$ ) |            | 0.03 | 0.37  | 1.95  | 0.76  |
|              |                          | $p < 0.01$ | c    | a     | b     | c     |
|              | Relative expression      |            | 0.10 | 3.39  | 10.62 | 2.90  |
| <i>Tri14</i> | Standard error ( $\pm$ ) |            | 0.01 | 0.59  | 1.86  | 1.01  |

|               |                          |      |       |      |       |
|---------------|--------------------------|------|-------|------|-------|
|               | $p < 0.01$               | b    | b     | a    | b     |
|               | Relative expression      | 5.00 | 24.31 | 0.16 | 31.40 |
| <i>Tri101</i> | Standard error ( $\pm$ ) | 1.76 | 3.01  | 0.01 | 0.65  |
|               | $p < 0.01$               | c    | b     | c    | a     |

9

10 **Table S2** Relative expression levels and standard errors of each wheat gene selected for each durum wheat genotype  
11 (Marco Aurelio and DBC480) and compound (chitosan C, tebuconazole T, azoxystrobin A, and the mixture of tebuconazole  
12 and azoxystrobin T + A). Fg represents the *F. graminearum* inoculated control. Relative expression values were obtained by  
13 using the equation  $2^{-\Delta\Delta Cq}$  with *TaFNR*, *TaTUB* and *TaACT* as reference genes and mock treatment used to normalize the  
14 relative expression levels. The data represent averages and standard errors for the four independent biological replicates  
15 and the four technical replicates examined. The data were subjected to two-way analysis of variance (ANOVA). Different  
16 letters among the plant treatments were assessed by means of significant F values by applying the Tukey Honestly  
17 Significant Difference Test (Tukey test) at 0.99 confidence level ( $p < 0.01$ ).

| Gene                                  | Marco Aurelio |      |      |      |       | DBC480 |      |      |      |       |
|---------------------------------------|---------------|------|------|------|-------|--------|------|------|------|-------|
|                                       | Fg            | C    | T    | A    | T + A | Fg     | C    | T    | A    | T + A |
| Relative expression                   | 2.89          | 1.76 | 1.16 | 1.09 | 0.84  | 2.62   | 2.35 | 0.67 | 2.29 | 0.27  |
| <i>TaPAL</i> Standard error ( $\pm$ ) | 0.22          | 0.29 | 0.22 | 0.27 | 0.23  | 0.84   | 0.66 | 0.10 | 0.80 | 0.07  |
| $p < 0.01$                            | a             | b    | b    | b    | c     | a      | a    | c    | a    | c     |
| Relative expression                   | 3.48          | 2.91 | 0.87 | 0.98 | 1.05  | 2.04   | 2.16 | 1.21 | 1.47 | 0.84  |
| <i>TaPR1</i> Standard error ( $\pm$ ) | 0.27          | 0.61 | 0.22 | 0.18 | 0.28  | 0.56   | 0.59 | 0.16 | 0.44 | 0.12  |
| $p < 0.01$                            | a             | b    | c    | c    | c     | b      | b    | c    | bc   | c     |
| Relative expression                   | 2.51          | 2.69 | 0.47 | 0.49 | 0.40  | 3.41   | 3.23 | 1.79 | 1.04 | 0.61  |
| <i>TaPR2</i> Standard error ( $\pm$ ) | 0.69          | 0.34 | 0.16 | 0.13 | 0.05  | 0.52   | 0.83 | 0.26 | 0.20 | 0.08  |
| $p < 0.01$                            | b             | b    | d    | d    | d     | a      | a    | b    | c    | d     |

18

19 **Table S3** A list of *F. graminearum* selected genes, accession numbers, gene functions, primer pairs, amplicon length from  
20 DNA and cDNA and primer pairs references.

| Gene and Accession Number       | Function               | Primer Pairs (5'-3')                              | bp (DNA) | bp (cDNA) | Reference             |
|---------------------------------|------------------------|---------------------------------------------------|----------|-----------|-----------------------|
| <i>Erg3</i> - XM_011320132.1    | C5-sterol desaturase   | ACCAACAACCCTGTCGTCAA<br>TCCGTATAAGTGC GGTTGTCA    | 239      | 239       | Yun et al., 2014      |
| <i>Fg03624</i> - XM_011323775.1 | Xylanase               | CTTCCGGTGCTCAGAAGAAGG<br>CGGACCAGTACTGCTGGAAGG    | 87       | 87        | Carapito et al., 2008 |
| <i>Fg03695</i> - XM_011323698.1 | Endoglucanase          | GCATCAACCTCAAGGTCCTGG<br>TGC GTAGAGGTTGAAGAGAATGC | 127      | 127       | Carapito et al., 2008 |
| <i>Fg07551</i> - XM_011329028.1 | Exopolygalacturonase   | GGCTCTCTTGGCCAGTACAAGG<br>AAGGTGACGTTGTCTGATGAAGC | 126      | 126       | Carapito et al., 2008 |
| <i>Fg09443</i> - XM_011329987.1 | Pectin methyl esterase | TGTTGAGGAGAAGACCACCTTCC<br>AGAAGAGCCACCGTTGCTACC  | 121      | 121       | Carapito et al., 2008 |

|                                    |                                               |                                                            |     |     |                                      |
|------------------------------------|-----------------------------------------------|------------------------------------------------------------|-----|-----|--------------------------------------|
| <i>Fg03725 -</i><br>XM_011323666.1 | Multidrug transporter                         | TGGTCGTC AATACCTCTTCATTGG<br>TACCACCAGCGTTGGTAAGAGG        | 111 | 111 | Carapito et al., 2008                |
| <i>Fg01572 -</i><br>XM_011319083.1 | Glutamate<br>decarboxylase                    | GGCCAATACTACCAGCTCATCC<br>CGAACGTTCTGACATGATGACG           | 115 | 115 | Carapito et al., 2008                |
| <i>Fg04196 -</i><br>XM_011323131.1 | Succinate<br>semialdehyde<br>dehydrogenase    | GCCGGATACTTCTTCTCCAAGG<br>CGTAACCGTCTCCTTGACACC            | 126 | 126 | Carapito et al., 2008                |
| <i>Fg06619 -</i><br>XM_011327936.1 | NADP-dependent<br>alcohol<br>dehydrogenase    | CTCAGCCTCCTCGATATTCACG<br>AAGTGAGACGTGCCGATGTAGC           | 122 | 122 | Carapito et al., 2008                |
| <i>Fg10231 -</i><br>XM_011320878.1 | NADH-ubiquinone<br>oxidoreductase             | CCAAGGCCACTGCTACTGATCC<br>CAGATCCTTCTTGTGGTCTCG            | 115 | 115 | Carapito et al., 2008                |
| <i>FPP -</i><br>XM_011328132.1     | Farnesyl<br>pyrophosphate<br>synthase         | TTTGCAAGCCCGAACACATT<br>GCGGATCTGGCCAACAACCTTCT            | 234 | 234 | Lee et al., 2014                     |
| <i>Tri1 -</i><br>AY339129.1        | Cytochrome P450<br>monooxygenase              | GCTCGGAACTAATCACTCC<br>TCCAAACATTGGCAGATGA                 | 185 | 185 | Heidtmann-<br>Bemvenuti et al., 2015 |
| <i>Tri3 -</i><br>XM_009265280.1    | Trichothecene 15-O-<br>acetyltransferase      | CTTGCAAGGATATCAAGAAATGTTACGA<br>CTCGCCTGTTGTAGTTCGCTTGATTT | 208 | 208 | Lee et al., 2014                     |
| <i>Tri4 -</i><br>EF685280.1        | Trichodiene<br>oxygenase                      | TCGAGGCACAACAGAAGGGTATCC<br>AATGTCGGCCTTGGTGGTGTC          | 237 | 237 | Lee et al., 2014                     |
| <i>Tri5 -</i><br>XM_011323870.1    | Trichodiene synthase                          | GGAGCGTATCGA GAATTGTC<br>TGCCCAACTGTATACGACCA              | 168 | 168 | Heidtmann-<br>Bemvenuti et al., 2015 |
| <i>Tri6 -</i><br>AB017495.1        | Trichothecene<br>transcriptional<br>regulator | TCTTTGTGAGCGGACGGGACTTTA<br>ATCTCGCATGTTATCCACCCTGCT       | 245 | 245 | Horevaj et al., 2011                 |
| <i>Tri8 -</i><br>HG970333.1        | Trichothecene 3-O-<br>esterase                | GCTACTTTGGACTCAATTCG<br>CATACTGTACCGCAAGTTCTG              | 139 | 139 | Lee et al., 2014                     |
| <i>Tri9 -</i><br>LT222054.1        | Unknown                                       | AGCCGCTAAACTGATCGACTCATA<br>GCTTTGGCTGCGACCCATAT           | 85  | 85  | Lee et al., 2014                     |
| <i>Tri10 -</i><br>AF365969.1       | Regulatory gene                               | GTGGCCGGGACGCTTCAAT<br>ATCCGTC AAGTCTTCCCATCTCAT           | 254 | 254 | Brown et al., 2001                   |
| <i>Tri11 -</i><br>XM_009265275.1   | Trichothecene C-15<br>hydroxylase             | AAGTACTTCACCCGACCAAACGAC<br>CGGCAAGGCGAATGTCAAAC           | 192 | 192 | Lee et al., 2014                     |
| <i>Tri12 -</i><br>XM_009265274.1   | Trichothecene efflux<br>pump                  | TCCACAGTCATCTTTCCCCAGTCT<br>CTCCCAGTGCCATAGCGAAGTAGT       | 172 | 172 | Lee et al., 2014                     |
| <i>Tri14 -</i><br>XM_009265272.1   | Unknown                                       | CTGGGAACCTACGCATCAAACATT<br>CGAATGAGCTGCCAATGATGT          | 165 | 165 | Lee et al., 2014                     |
| <i>Tri101 -</i><br>AB011417.1      | Trichothecene 3-O-<br>acetyltransferase       | GTGGGACTCTGGGATTACGACTTT<br>GTCCACTCCTTATCCGCTTCAA         | 130 | 130 | Lee et al., 2014                     |

|                                  |                                                 |                                                       |     |     |                       |
|----------------------------------|-------------------------------------------------|-------------------------------------------------------|-----|-----|-----------------------|
| <i>TEF</i> -<br>MH572267.1       | Translational<br>elongation factor 1- $\alpha$  | ATGGGTAAGGAGGACAAGAC<br>GGAAGTACCAGTGATCATGTT         | 700 | 324 | Geiser et al., 2004   |
| <i>TUB</i> -<br>XM_011329885     | $\beta$ -tubulin                                | TTGCATTGGTACACTGGTGAGG<br>AGGCAGCTCCTCCTCGTACTCC      | 110 | 110 | Carapito et al., 2008 |
| <i>GAPDH</i> -<br>XM_011326605.1 | Glyceraldehyde-3-<br>phosphate<br>dehydrogenase | TGACTTGACTGTTTCGCCTCGAGAA<br>ATGGAGGAGTTGGTGTGCGCGTTA | 160 | 160 | Harris et al., 2016   |

21

22 **Table S4** A list of wheat selected genes, accession numbers, gene functions, primer pairs, amplicon length from DNA and  
23 cDNA and primer pairs references.

| Gene and Accession<br>Number | Function                              | Primer Pairs (5'-3')                           | bp<br>(DNA) | bp<br>(cDNA) | Reference                   |
|------------------------------|---------------------------------------|------------------------------------------------|-------------|--------------|-----------------------------|
| <i>TaPAL</i> - X99705        | Phenylalanine ammonia-lyase           | CGATGCTCGTCCGAGTCAAT<br>CATGACCTCACAGAAGACGC   | 407         | 407          | <i>De novo</i> designed     |
| <i>TaPR1</i> - AJ007348      | Pathogenesis related protein-1        | ACTACGACTACGGGTCCAACA<br>TCGTAGTTGCAGGTGATGAAG | 145         | 145          | Lu et al., 2006             |
| <i>TaPR2</i> - Y18212        | $\beta$ -1,3-glucanase                | AACGTGCGCCCCTACTACC<br>CGCTCGAACAGGCTCGTGTA    | 398         | 398          | Francesconi et al.,<br>2020 |
| <i>TaFNR</i> - AJ457980      | Ferredoxin-NADP(H)-<br>oxidoreductase | CACCGGCCAGTGATCTT<br>AAGGGCGTCTGCTCCAAC        | 259         | 69           | Tenea et al., 2011          |
| <i>TaTUB</i> - TAU76745      | $\beta$ -tubulin                      | CGAGGAGGGCGAGTACGA<br>AGCAAAGCACGACATGGACAT    | 79          | 79           | Tenea et al., 2011          |
| <i>TaACT</i> - AB181991      | Actin                                 | TCCTGTGTTGCTGACTGAGG<br>GGTCCAAACGAAGGATAGCA   | 350         | 236          | Mandalà et al.,<br>2019     |

24

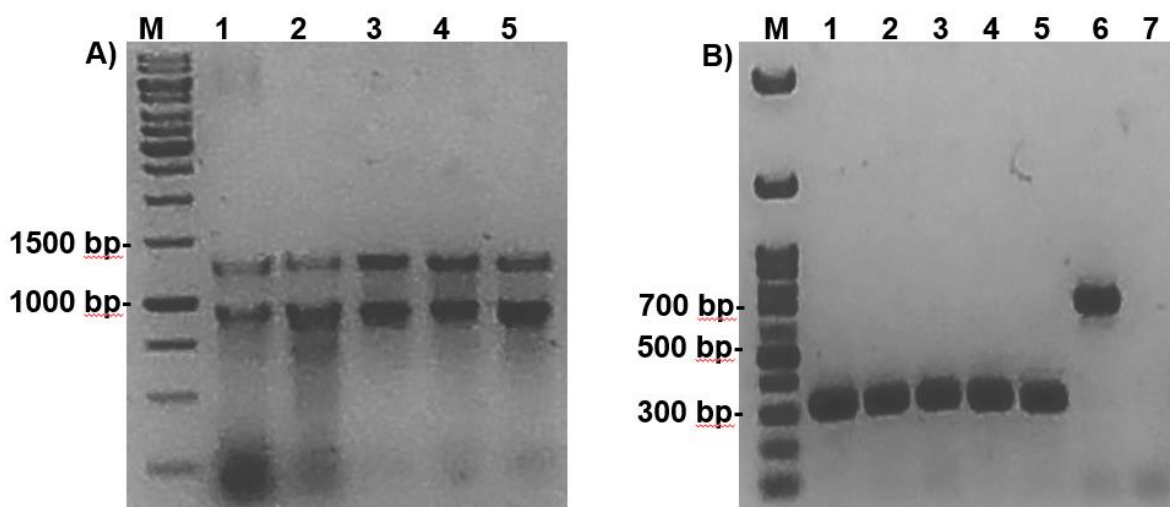

25

26 **Figure S1** 1.5% agarose gel of total extracted RNA (A) and RT-PCR (B) from *F. graminearum*. M) GeneRuler™ 1 kb DNA  
27 Ladder (Thermo Fisher Scientific) and ExcelBand™ 100 bp + 3K DNA Ladder (Smobio); (1) Chitosan hydrochloride; (2)  
28 Tebuconazole; (3) Azoxystrobin; (4) Tebuconazole+Azoxystrobin; (5) Mock; (6) Genomic DNA (gDNA); (7) No template  
29 control (NTC). The figure represents the original pictures of the gels.  
30

31 **Figure S2** Durum seedlings at 14 days after the coating with chitosan hydrochloride at 0.5% (C). M represents the mock  
32 control.

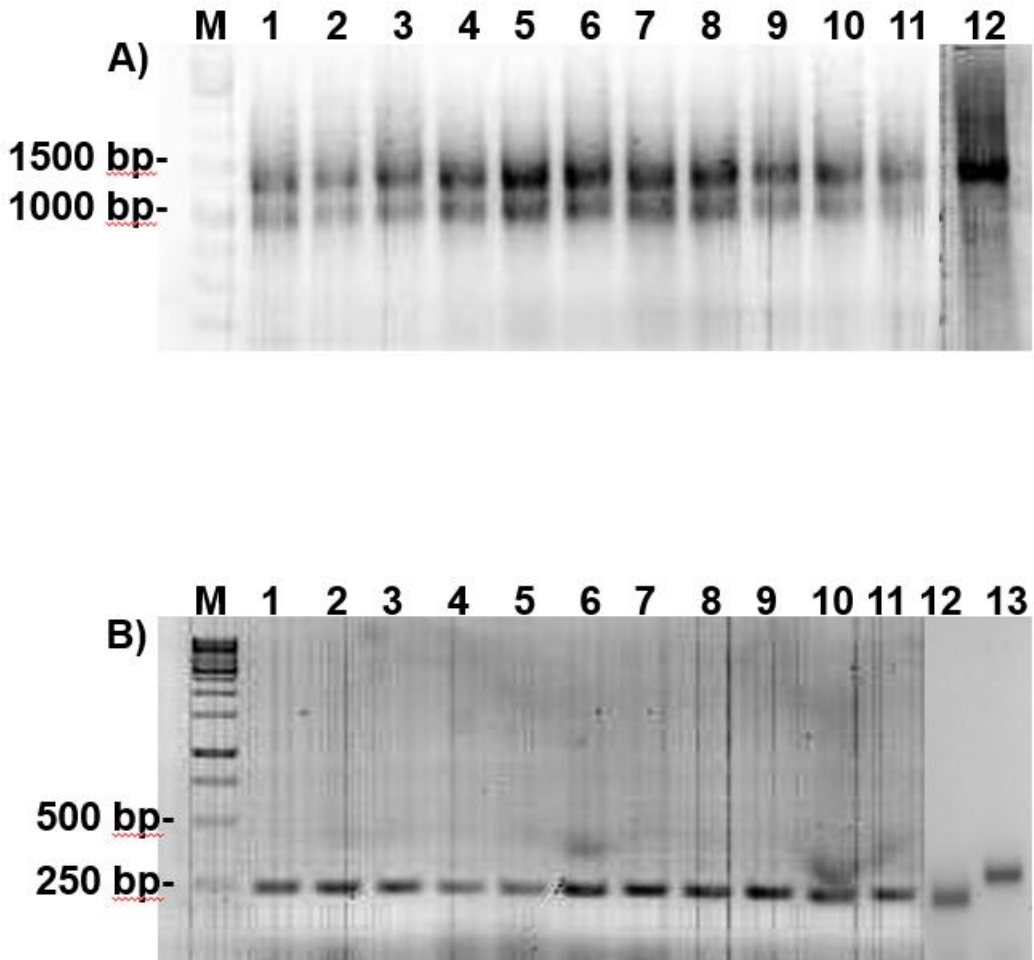

33  
 34 **Figure S3** 1.5% agarose gel of total extracted RNA (A) and RT-PCR (B) from the spikes of Marco Aurelio and DBC480  
 35 subjected to the different compounds' treatments at the flag leaf level. M) GeneRuler™ 1 kb DNA Ladder (Thermo Fisher  
 36 Scientific); (1) Marco Aurelio, chitosan; (2) Marco Aurelio, tebuconazole; (3) Marco Aurelio, azoxystrobin; (4) Marco  
 37 Aurelio, tebuconazole+azoxystrobin; (5) Marco Aurelio, *F. graminearum* inoculated control; (6) Marco Aurelio, mock  
 38 control; (7) DBC480, chitosan; (8) DBC480, tebuconazole; (9) DBC480, azoxystrobin; (10) DBC480,  
 39 tebuconazole+azoxystrobin; (11) DBC480, *F. graminearum* inoculated control; (12) DBC480, mock control; (13) Genomic  
 40 DNA (gDNA). The figure represents the pictures of three gels. The original pictures of the gels are available if requested.
